# Supplementary material for: Electrochemical and electrical characteristics of ball milled Cs2Ti6O13 modified by the surface-to-bulk migration of hydroxyl groups
Source: Royal Society of Chemistry journal article supplement (doi:10.1039/d3dt01437a), 2023-01-01
Supplement: d3dt01437a1.pdf [file d3dt01437a1.pdf]

*Electronic Supplementary Information*

**Electrochemical and electrical characteristics of ball milled Cs<sub>2</sub>Ti<sub>6</sub>O<sub>13</sub> modified by the surface-to-bulk migration of hydroxyl groups**

Tosapol Maluangnont,<sup>a,b\*</sup> Phieraya Pulphol,<sup>c</sup> Kanisorn Klangvijit,<sup>a</sup>

Khemjiranee Bowornthommatadsana,<sup>a</sup> Narong Chanlek,<sup>d</sup> Makoto Ogawa,<sup>e</sup>

and Winadda Wongwiriyan<sup>a</sup>

<sup>a</sup> College of Materials Innovation and Technology, King Mongkut's Institute of Technology Ladkrabang, Bangkok, 10520, Thailand

<sup>b</sup> Advanced Materials Research Unit, School of Science, King Mongkut's Institute of Technology Ladkrabang, Bangkok, 10520, Thailand

<sup>c</sup> Department of Materials Science, Faculty of Science, Srinakharinwirot University, Bangkok 10110, Thailand

<sup>d</sup> Synchrotron Research and Applications Division, Synchrotron Light Research Institute (Public Organization), Nakhon Ratchasima, 30000, Thailand

<sup>e</sup> School of Energy Science and Engineering, Vidyasirimedhi Institute of Science and Technology, Rayong 21210, Thailand

\*Corresponding author: [tosapol.ma@kmitl.ac.th](mailto:tosapol.ma@kmitl.ac.th)

## Characterization

X-ray diffraction (XRD) measurements were performed on a Rigaku, DMAX 2200/Ultima+ diffractometer (Cu K $\alpha$  radiation, 40 kV, 30 mA). The powder was mixed with a small amount of LaB<sub>6</sub> as the internal standard for unit cell parameters determination, which was refined by CellCalc<sup>1</sup> at  $2\theta = 5-50^\circ$ . Raman spectra were recorded using a DXR Smart Raman (Thermo Scientific) with laser wavelength of 532 nm and the laser power of 5 mW. IR spectra were recorded in the attenuated total reflectance (ATR) mode using a PerkinElmer, Spectrum 2 instrument. Thermogravimetric analysis (TGA) was performed under the flow of N<sub>2</sub> gas (20 mL·min<sup>-1</sup>) from RT to 800 °C (10 °C·min<sup>-1</sup>) using a Perkin-Elmer, Pyris-1 instrument. Solid state <sup>1</sup>H NMR spectra were obtained using a JEOL JNM-ECZ400R/S1 spectrometer. The specific surface area  $S_{BET}$  was measured by an Autosorb-1C instrument (Quantachrome) after degassing at 300 °C. The microstructure and elemental composition were characterized using a scanning electron microscope (SEM; JEOL JSM-840A) equipped with an energy-dispersive X-ray (EDX) analyzer. X-ray photoelectron spectroscopy (XPS) measurements were conducted at the SUT-NANOTECH-SLRI XPS workstation (PHI 5000 VersaProbe II, monochromatized Al K $\alpha$  radiation at 1486.6 eV), with the binding energies calibrated to C 1s at 284.8 eV. The analysis area is 300 × 300  $\mu\text{m}^2$ .

Particle size and zeta potential of the samples were measured by dynamic light scattering (DLS) using a Delsa<sup>TM</sup> Nano Particle Size Analyzer (Beckman Coulter). An amount of 2-4 mg of the titanate and 3 mL of deionized water (pH 6) was loaded into a quartz cuvette followed by sonication for 300 s. The cuvette was then immediately taken to the instrument. A typical set up is the temperature of 25 °C, repetition number of 15, and the accumulation time 30 s.

Table S1 Summary of the unit cell parameters of the Cs<sub>2</sub>Ti<sub>6</sub>O<sub>13</sub> samples

| Sample      | $a/\text{Å}$ | $b/\text{Å}$ | $c/\text{Å}$ | Ref.                    |
|-------------|--------------|--------------|--------------|-------------------------|
| As made     | 3.815(3)     | 17.42(2)     | 2.967(6)     | This work               |
| Ball milled | 3.815(2)     | 17.45(7)     | 2.961(4)     | This work               |
| As made     | 3.825(2)     | 17.271(7)    | 2.961(1)     | Grey et al <sup>2</sup> |

The unit cell parameters of Cs<sub>2</sub>Ti<sub>6</sub>O<sub>13</sub> are practically similar between as made and ball milled samples. However, the observed  $a$ -parameter is smaller and the  $b$ -parameter is longer than the values first reported by Grey et al.<sup>2</sup> This might be explained by a small variation in actual stoichiometry between different laboratories.

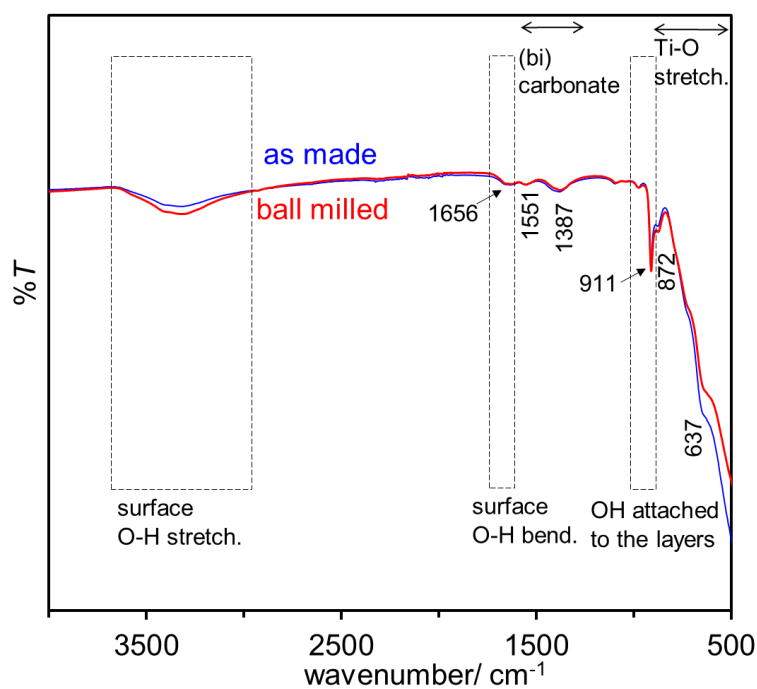

Figure S1. IR spectra of as made and ball milled  $\text{Cs}_2\text{Ti}_6\text{O}_{13}$ .

We observed the bands due to the lattice vibration of  $\text{TiO}_6$  (637, 872  $\text{cm}^{-1}$ ), surface carbonates/bicarbonates (1387, 1551  $\text{cm}^{-1}$ ), O-H bending (1656  $\text{cm}^{-1}$ ) and O-H stretching ( $\sim 3250$   $\text{cm}^{-1}$ ).<sup>3-7</sup> Most importantly, the sharp peak at 911  $\text{cm}^{-1}$  is visible which is typically assigned to the OH group directly attached to the layer as opposed to the surface.<sup>3-7</sup> The increased water concentration in the ball milled sample can also be inferred from the relative peak intensity. After ball milling, the Ti-O lattice vibration at 911  $\text{cm}^{-1}$  is weaker, but the O-H stretching at 3295-3313  $\text{cm}^{-1}$  is stronger. (The spectra were normalized to have the same intensity of the 911  $\text{cm}^{-1}$ -peak.) This simple comparison further supports the increasing surface hydroxyl groups induced by the soft vibratory ball milling. It is also consistent with the increased intensity of the band due to OH groups in the Raman spectra.

Table S2 Water content in lepidocrocite-type alkali titanates reported in the literature.

| Composition                                                                          | Treatment            | <i>n</i> | Wt%<br>water | Ref.                                |
|--------------------------------------------------------------------------------------|----------------------|----------|--------------|-------------------------------------|
| $\text{Cs}_2\text{Ti}_6\text{O}_{13}\cdot n\text{H}_2\text{O}$                       | As made              | 1.79     | 4.20         | This work                           |
| $\text{Cs}_2\text{Ti}_6\text{O}_{13}\cdot n\text{H}_2\text{O}$                       | Ball milled 2 h      | 1.87     | 4.39         | This work                           |
| $\text{Cs}_{0.7}\text{Zn}_{0.35}\text{Ti}_{1.65}\text{O}_4\cdot n\text{H}_2\text{O}$ | As made              | 1.1      | 7.3          | Maluangnont et al <sup>8</sup>      |
| $\text{Cs}_{0.7}\text{Zn}_{0.35}\text{Ti}_{1.65}\text{O}_4\cdot n\text{H}_2\text{O}$ | Ball milled 2 h      | 0.8      | 5.3          | Maluangnont et al <sup>8</sup>      |
| $\text{Cs}_{0.7}\text{Zn}_{0.35}\text{Ti}_{1.65}\text{O}_4\cdot n\text{H}_2\text{O}$ | Sintered 1100 °C 4 h | 0.03     | 2.26         | Sriphan et al <sup>9</sup>          |
| $\text{K}_{0.8}\text{Zn}_{0.4}\text{Ti}_{1.6}\text{O}_4\cdot n\text{H}_2\text{O}$    | As made              | 0.66     | 5.5          | Maluangnont et al <sup>10, 11</sup> |

The presence of physisorbed water can be deduced from the mass loss at the temperature less than 300 °C.<sup>8-11</sup> In the examples in Table S2, the XRD patterns are typical of the respective composition, without interlayer expansion due to intercalated water.

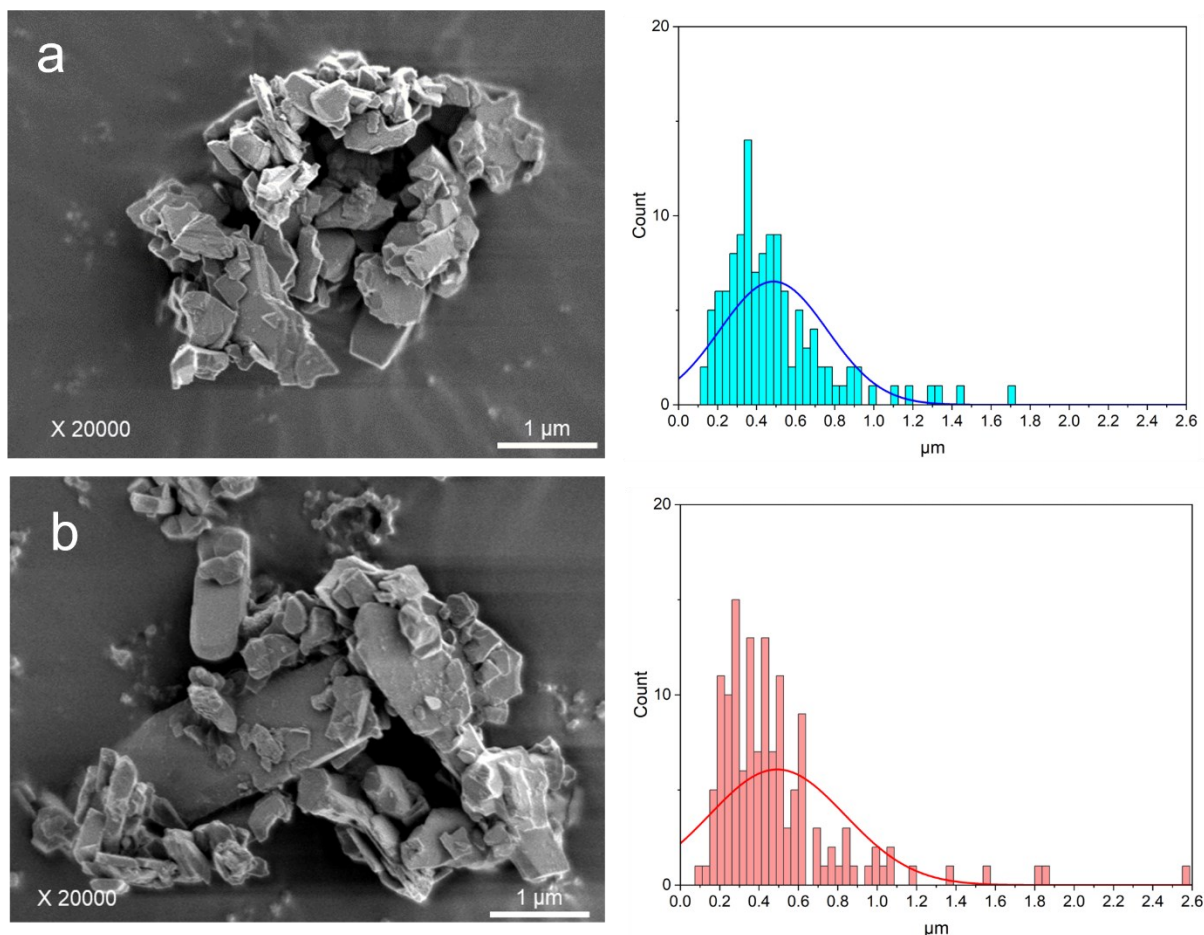

Figure S2 A representative SEM image and the histogram of size distribution of (a) as made, and (b) ball milled  $\text{Cs}_2\text{Ti}_6\text{O}_{13}$ .

From the image at 20,000 $\times$  magnification, the lateral size of as made  $\text{Cs}_2\text{Ti}_6\text{O}_{13}$  is 0.487  $\mu\text{m}$  (number of particle,  $N = 120$ ). This is practically identical to that of the ball milled  $\text{Cs}_2\text{Ti}_6\text{O}_{13}$  of 0.493  $\mu\text{m}$  ( $N = 140$ ). Accordingly, there is no significant change to the particle size or the distribution due to ball milling.

## Supplementary references

- (1) Miura, H. CellCalc: A unit cell parameter refinement program on Windows computer. *Nippon Kessho Gakkaishi* **2003**, *45*, 145-147 [in Japanese].
- (2) Grey, I. E.; Madsen, I. C.; Watts, J. A.; Bursill, L. A.; Kwiatkowski, J. New cesium titanate layer structures. *J. Solid State Chem.* **1985**, *58*, 350-356.
- (3) Sasaki, T.; Watanabe, M.; Michiue, Y.; Komatsu, Y.; Izumi, F.; Takenouchi, S. Preparation and acid-base properties of a protonated titanate with the lepidocrocite-like layer structure. *Chem. Mater.* **1995**, *7*, 1001-1007.
- (4) Sasaki, T.; Kooli, F.; Iida, M.; Michiue, Y.; Takenouchi, S.; Yajima, Y.; Izumi, F.; Chakoumakos, B. C.; Watanabe, M. A mixed alkali metal titanate with the lepidocrocite-like layered structure. Preparation, crystal structure, protonic form, and acid-base intercalation properties. *Chem. Mater.* **1998**, *10*, 4123-4128.
- (5) Izawa, H.; Kikkawa, S.; Koizumi, M. Ion exchange and dehydration of layered titanates,  $\text{Na}_2\text{Ti}_3\text{O}_7$  and  $\text{K}_2\text{Ti}_4\text{O}_9$ . *J. Phys. Chem.* **1982**, *86*, 5023-5026.
- (6) Sasaki, T.; Watanabe, M.; Komatsu, Y.; Fujiki, Y. Layered hydrous titanium dioxide: potassium ion exchange and structural characterization. *Inorg. Chem.* **1985**, *24*, 2265-2271.
- (7) Sasaki, T.; Komatsu, Y.; Fujiki, Y. Protonated pentatitanate: preparation, characterizations and cation intercalation. *Chem. Mater.* **1992**, *4*, 894-899.
- (8) Maluangnont, T.; Chanlek, N.; Khamman, O.; Vittayakorn, W.; Sooknoi, T. Structural and compositional characteristics of ball-milled lepidocrocite alkali titanate and the correlation to its surface acidic-basic properties. *Inorg. Chem.* **2021**, *60*, 16326-16336.
- (9) Sriphan, S.; Pulphol, P.; Charoonsuk, T.; Maluangnont, T.; Vittayakorn, N. Effect of adsorbed water and temperature on the universal power law behavior of lepidocrocite-type alkali titanate ceramics. *J. Phys. Chem. C* **2021**, *125*, 12910-12920.
- (10) Maluangnont, T.; Vittayakorn, N. Giant dielectric constants in  $\text{K}_{0.8}\text{M}_{0.4}\text{Ti}_{1.6}\text{O}_4$  (M = Ni, Zn) lepidocrocite-type titanate ceramics. *Integr. Ferroelectr.* **2019**, *195*, 100-108.
- (11) Maluangnont, T.; Chanlek, N.; Suksawad, T.; Tonket, N.; Saikhamdee, P.; Sukkha, U.; Vittayakorn, N. Beyond soft chemistry - bulk and surface modifications of polycrystalline lepidocrocite titanate induced by post-synthesis thermal treatment. *Dalton Trans.* **2017**, *46*, 14277-14285.
